# Supplementary material for: Revealing the Introduction History and Phylogenetic Relationships of Passiflora foetida sensu lato in Australia
Source: Front Plant Sci. 2021 Jul 29;12:651805. doi: 10.3389/fpls.2021.651805 (PMC8358147; doi:10.3389/fpls.2021.651805)
Supplement: Supplementary file 3 [file Table_1.xlsx]

## Sheet: Sheet1
Taxon Name	Country/cultivated	Collection Date	Collector	Collector number	Herbarium	Specimen Accession number	ID	Latitude	Longitude	Status
Adenia acuta W.J. de Wilde	Madagascar	2013-12-14	Antilahimena, Patrice	8773	MOBOT	100668045	PH1	-18.8928	48.4486	native
Passiflora alata Curtis	cultivated	2019-01-21	Greg Daley				PA431			non-native
Passiflora ambigua Hemsl.	Nicaragua	2016-03-05	Stevens, Warren Douglas	37164	MOBOT	100903774	PH2	12.9425	-85.4872	native
Passiflora aurantia G.Forst. var. aurantia	Australia	2010-11-08	Waterhouse, B.M.	7886	CANB	CANB724108	PAH92	-15.9614	145.316	native
Passiflora aurantia G.Forst. var. aurantia	Australia	2014-10-16	Collins, B.M.	433	CANB	CANB878682	PAH93	-24.7961	147.693	native
Passiflora aurantia var. pubescens F.M.Bailey	Australia	2011-02-09	Pollock,A.B.	ABP2789	QLD	AQ796378	PAH87	-24.6882	150.978	native
Passiflora aurantioides (K.Schum.) Krosnick	Australia	2004-10-14	Ford,A.	4473	QLD	AQ648066	PAH89	-17.3033	145.92	native
Passiflora caerulea L.	Australia	2008-11-08	Purdie, R.W.	6952	CANB	CANB779853	PAH94	-35.3197	149.053	non-native
Passiflora cinnabarina Lindl.	Australia	1993-11-04	Knight, J.	629	CANB	CANB523925	PAH96	-37.2833	149.879	native
Passiflora cinnabarina Lindl.	Australia	2015-11-06	Purdie, R.W.	10505	CANB	CANB885989	PAH98	-35.2753	149.102	native
Passiflora coccinea Aubl.	Australia	2013-03-06	Westaway, J.O.	4126	CANB	CANB818192	PAH99	-12.5458	131.156	non-native
Passiflora coccinea Blanco	cultivated	2019-01-08	David Peaseley				PA429			non-native
Passiflora edulis Sims	cultivated		nursery				PA397			non-native
Passiflora edulis Sims	cultivated	2019-01-08	David Peaseley				PA428			non-native
Passiflora filamentosa Cav.	Australia	2009-09-27	Coveny, R.G.	19395	CANB	CANB721483	PAH100	-32.2639	150.733	non-native
Passiflora foetida L.	Argentina	1997-12-09	Maria E. Múlgura de Romero, F. Biganzoli, H. Illarraga & Andrea S. Vega	1688	MOBOT	5161078	PH7	-27.4333	-55.5667	native
Passiflora foetida L.	Argentina	2001-11-16	Osvaldo Morrone, Norma B. Deginani & Sandra S. Aliscioni	3670	MOBOT	5693995	PH8	-26.4667	-65.3667	native
Passiflora foetida L.	Belize	1987-03-18	Gerrit Davidse & Alan E. Brant	32640	MOBOT	3428211	PH11	18.2833	-88.25	native
Passiflora foetida L.	Bolivia	2007-02-15	E. Cervantes, E. Portal, H. Huaylla, L. Vedia & J. Alberto Peñaranda	98	MOBOT	6074305	PH12	-19.1564	-65.2728	native
Passiflora foetida L.	Bolivia	2007-01-28	Maribel Vargas C.	313	MOBOT	6057017	PH13	-18.3125	-63.6742	native
Passiflora foetida L.	Bolivia	2008-02-01	M. Jiménez & A. Flores	819	MOBOT	6086854	PH14	-20.5219	-63.8186	native
Passiflora foetida L.	Bolivia	2005-12-08	Michael H. Nee, D. Villarroel & Oscar Colque	53661	MOBOT	6032547	PH16	-18.0575	-64.6036	native
Passiflora foetida L.	Bolivia	2003-03-13	L. Rico & students of UMSS	1566	MOBOT	5909000	PH17	-17.5739	-66.2631	native
Passiflora foetida L.	Brazil	1994-10-19	VILLAROUCO	12	MOBOT	5682094	PH18	-8.61667	-37.1667	native
Passiflora foetida L.	Brazil	1977-10-15	L. Coradín & Manoel dos R. Cordeiro	710	MOBOT	2633416	PH20	2.94083	-60.4642	native
Passiflora foetida L.	Brazil	1998-04-23	M. de F. Agra & P.C. da Silva	5215	MOBOT	4926489	PH22	-7.18611	-37.4314	native
Passiflora foetida L.	Brazil	1992-12-01	Maria M. Arbo, Renato de Mello-Silva & Joao Vicente	5455	MOBOT	5009565	PH23	-10.6783	-40.1333	native
Passiflora foetida L.	Brazil	1973-08-02	Eduardo Lleras, William C. Steward, J.C. Ongley, Dionizio F. Coêlho, José F. Ramos & José F. Lima	17030	MOBOT	2667577	PH25	-5.13333	-72.8167	native
Passiflora foetida L.	Brazil	1991-11-10	Gert G. Hatschbach & J.M. Silva	56038	MOBOT	5161070	PH27	-12.8167	-47.1333	native
Passiflora foetida L.	Brazil	1992-10-10	M.R. Silva & C.E. Rodrigues	479-B	MOBOT	5015711	PH28	-20.3672	-51.4189	native
Passiflora foetida L.	Brazil	1987-11-04	Shunsuke Tsugaru & Haruo Guinoza	B-2018	MOBOT	3687170	PH29	-21.0667	-54.6833	native
Passiflora foetida L.	Dominica	1993-12-28	James Higgins, John Higgins & Prosper Paris	71	MOBOT	5161086	PH30	15.4833	-61.2833	native
Passiflora foetida L.	Dominican Republic	2010-05-15	S. Krosnick, Petersen, Jennifer J. & Teodoro Clase	617	MOBOT	6253632	PH31	18.3953	-71.5653	native
Passiflora foetida L.	Dominican Republic	2009-05-28	Teodoro Clase, R. Oviedo, M. Islam & A. Velez	5449	MOBOT	6241075	PH33	18.4833	-71.0833	native
Passiflora foetida L.	Dominican Republic	2009-07-10	Teodoro Clase, Filomeno Encarnación, L. Vasquez, A. Hilario & J. Coronado	5625	MOBOT	6241074	PH34	19.6847	-71.6786	native
Passiflora foetida L.	Bahamas	1981-07-10	see Sauleda, Ruben Primitivo & Diane K. Sauleda	5721	MOBOT	2895735	PH35	25.3719	-76.5289	native
Passiflora foetida L.	Puerto Rico	1996-06-16	Franklin S. Axelrod & L. Pérez	9822	MOBOT	5178504	PH36	18.4458	-66.26	native
Passiflora foetida L.	Trinidad and Tobago	1989-07-13	Richard D. Worthington	17990	MOBOT	3777801	PH38	11.15	-60.8167	native
Passiflora foetida L.	Jamaica	1980-02-04	Alwyn H. Gentry & Valerie Kapos	28375	MOBOT	2813702	PH39	17.8333	-77.3667	native
Passiflora foetida L.	Puerto Rico	1993-03-13	Robert Ross & J. Salguero	SAN618	MOBOT	4663778	PH40	17.9794	-66.2983	native
Passiflora foetida L.	Colombia	1987-04-25	J. Lizcano	20	MOBOT	3857304	PH42	3.21667	-75.2	native
Passiflora foetida L.	Colombia	1992-12-30	Patricia Gómez A. & et al.	828	MOBOT	4640966	PH44	8.53333	-76.45	native
Passiflora foetida L.	Colombia	2000-04-12	Francisco J. Roldán & et al.	3229	MOBOT	4777124	PH46	6.58333	-75.9167	native
Passiflora foetida L.	Costa Rica	2000-04-13	Luis Acosta, Gerardo Soto, Geovanny Sancho & Armando Soto	898	MOBOT	5855557	PH49	10.8028	-85.6528	native
Passiflora foetida L.	Costa Rica	2003-01-14	José Á. González R. & Roberto Espinoza	2619	MOBOT	4805778	PH50	10.8483	-85.6989	native
Passiflora foetida L.	Ecuador	1996-02-27	John L. Clark	2178	MOBOT	4961779	PH53	0.35	-79.7	native
Passiflora foetida L.	Ecuador	2009-02-15	P.M. Jørgensen & Segundo Chimbolema	2459	MOBOT	6358064	PH54	-3.33444	-79.4444	native
Passiflora foetida L.	Ecuador	1991-10-27	Carlos E. Cerón	17258	MOBOT	5863430	PH57	-4.35	-78.6667	native
Passiflora foetida L.	Ecuador	1964-01-24	Ira L. Wiggins	18326	MOBOT	4961409	PH58	-0.683333	-90.3	native
Passiflora foetida L.	El Salvador	2006-12-03	Dagoberto Rodríguez	DR-00631	MOBOT	6127649	PH59	13.2833	-87.75	native
Passiflora foetida L.	El Salvador	2007-07-26	Dagoberto Rodríguez, Jorge Monterrosa S. & M. Carranza	DR-00917	MOBOT	6127648	PH60	14.3833	-89.3667	native
Passiflora foetida L.	Guyana	1991-04-03	Tim McDowell, Doorjoohan Gopaul & J. Bowdre	4194	MOBOT	4961671	PH62	7.36667	-60.4667	native
Passiflora foetida L.	Honduras	1987-05-07	Steve Blackmore & Mary Chorley	3686	MOBOT	3663344	PH63	14.8833	-88.0333	native
Passiflora foetida L.	Mexico	1983-01-12	James S. Miller, David A. Neill & Frederick Neill	417	MOBOT	3446903	PH65	19.5	-105.05	native
Passiflora foetida L.	Mexico	1999-07-08	Mitch C. Provance	1296	MOBOT	4856305	PH67	21.8317	-102.72	native
Passiflora foetida L.	Mexico	2001-05-23	Alejandro Novelo R., M.A. Ordóñez L. & A. Guerra M.	4120	MOBOT	5768494	PH69	18.3439	-92.5903	native
Passiflora foetida L.	Mexico	2004-07-17	Alberto Reyes-García, Daniel Gómez C. & Erick Figueroa	7413	MOBOT	6132644	PH70	16.3278	-93.5781	native
Passiflora foetida L.	Mexico	2001-05-27	Pedro Tenorio L.	20159	MOBOT	5675800	PH71	18.1	-97.2	native
Passiflora foetida L.	Mexico	1998-04-09	E. Alvarez D. & Santiago Ramírez A.	30601	MOBOT	5618349	PH72	18.9786	-89.3058	native
Passiflora foetida L.	Mexico	2004-08-27	Mitch C. Provance	9545B	MOBOT	4836085	PH73	26.9208	-108.919	native
Passiflora foetida L.	Mexico	1986-12-01	Antonio Salinas T.	F-3751	MOBOT	3719897	PH74	18.28	-97.48	native
Passiflora foetida L.	Nicaragua	2008-06-18	W. D. Stevens, O.M. Montiel, Christopher Davidson & Sharon R. Christoph	27313	MOBOT	6116099	PH76	13.7122	-86.5017	native
Passiflora foetida L.	Nicaragua	2010-05-20	W. D. Stevens, O.M. Montiel & E. Duarte M.	30017	MOBOT	6253101	PH78	13.1644	-86.3069	native
Passiflora foetida L.	Panama	1982-02-17	Sandy Knapp & Robert J. Schmalzel	3589	MOBOT	3111580	PH80	9.5	-79.6667	native
Passiflora foetida L.	Panama	1982-07-06	Sandy Knapp	5955	MOBOT	2946427	PH81	9.08333	-78.45	native
Passiflora foetida L.	Paraguay	1993-11-25	Maria M. Arbo, G.I. Lavia, M.G. Pellegrini & R. Beron	6094	MOBOT	4653847	PH82	-25.5694	-57.1325	native
Passiflora foetida L.	Paraguay	1998-12-14	Elsa M. Zardini & N. Duarte	49860	MOBOT	5865612	PH84	-21.2103	-61.6572	native
Passiflora foetida L.	Paraguay	1999-02-12	Elsa M. Zardini & J. Godoy	50015	MOBOT	5865631	PH85	-20.5567	-59.8411	native
Passiflora foetida L.	Paraguay	2000-06-04	Elsa M. Zardini & Leongino Guerrero	54744	MOBOT	5733127	PH86	-24.9236	-58.1853	native
Passiflora foetida L.	Paraguay	2001-11-01	Elsa M. Zardini & Leongino Guerrero	56956	MOBOT	5865639	PH87	-23.4533	-57.4697	native
Passiflora foetida L.	Peru	5/1986 - 6/1986	P. Francia	6	MOBOT	5499805	PH88	-9.48333	-78.2833	native
Passiflora foetida L.	Peru	2004-05-24	Luis Valenzuela	3740	MOBOT	5949290	PH89	-13.3925	-72.8672	native
Passiflora foetida L.	Peru	2004-04-01	Washington L. Galiano	5753	MOBOT	5956886	PH90	-13.5181	-72.5186	native
Passiflora foetida L.	Peru	2004-04-20	Washington L. Galiano, Efraín Suclli, Percy Núñez V., A. Rodríguez & V. Chama	6282	MOBOT	5956887	PH91	-12.7678	-72.6333	native
Passiflora foetida L.	Peru	2011-05-11	Narel Paniagua Zambrana, Rainer W. Bussmann & Carlos Vega Ocaña	8243	MOBOT	6607307	PH94	-6.935	-78.0119	native
Passiflora foetida L.	Peru	2007-01-02	Isau Huamantupa	8445	MOBOT	6253975	PH95	-14.8167	-74.85	native
Passiflora foetida L.	Venezuela	1967-06-06	Kenneth R. Robertson & Daniel F. Austin	137	MOBOT	2005350	PH96	10.4167	-66.925	native
Passiflora foetida L.	Guatemala	2005-11-05	Ramirez, F & Cano, M	1537	MOBOT	6282205	PH101	15.5333	-89.3	native
Passiflora foetida L.	Mexico	2009-09-12	Esteban Martinez Luis	364	MOBOT	6281926	PH102	16.5456	-95.9578	native
Passiflora foetida L.	Philippines	1964-03-01	Kellman, M.	ANU 1558	CANB	CANB137143	PAH105	7.06667	125.6	non-native
Passiflora foetida L.	Brazil		Davi Macedo, Robert Barreto and Marcelo Diniz Vitorino				Bpf107	-7.09422	-34.8341	native
Passiflora foetida L.	Brazil		Davi Macedo, Robert Barreto and Marcelo Diniz Vitorino				Bpf27	-9.33051	-40.557	native
Passiflora foetida L.	Brazil		Davi Macedo, Robert Barreto and Marcelo Diniz Vitorino				Bpf9	-10.9679	-37.0361	native
Passiflora foetida L.	Brazil		Davi Macedo, Robert Barreto and Marcelo Diniz Vitorino				Bpf90	-9.72547	-36.6746	native
Passiflora foetida L.	Colombia		Mauricio Alberto Salazar Yepes, Juan Gonzalo Morales and Paola Betancur García				Cot	6.536	-75.83	native
Passiflora foetida L.	Colombia		Mauricio Alberto Salazar Yepes, Juan Gonzalo Morales and Paola Betancur García				Fra	6.63592	-75.8194	native
Passiflora foetida L.	Colombia		Mauricio Alberto Salazar Yepes, Juan Gonzalo Morales and Paola Betancur García				P2	6.53708	-75.8316	native
Passiflora foetida L.	Australia	2017-07-30	Ryan Zonneveld and Christine Goosem				PA1	-16.4992	145.002	non-native
Passiflora foetida L.	Australia	2017-11-21	Gio Fichera				PA10	-19.9397	147.631	non-native
Passiflora foetida L.	Australia	2017-11-22	Gio Fichera				PA11	-23.3475	150.492	non-native
Passiflora foetida L.	Australia	2018-10-14	Gavan Mullan				PA118	-24.8576	113.712	non-native
Passiflora foetida L.	Australia	2017-09-12	Bruce Webber & Paul Yeoh				PA13	-18.0663	125.73	non-native
Passiflora foetida L.	Australia	2018-07-17	Gio Fichera and S. Raghu				PA131	-17.0208	145.338	non-native
Passiflora foetida L.	Malaysia	2018-04-12					PA132	2.88468	103.327	non-native
Passiflora foetida L.	Australia	2018-07-19	Gio Fichera and S. Raghu				PA142	-18.1008	144.83	non-native
Passiflora foetida L.	Australia	2018-07-19	Gio Fichera and S. Raghu				PA153	-17.1716	141.767	non-native
Passiflora foetida L.	Australia	2018-07-19	Gio Fichera and S. Raghu				PA163	-17.9309	140.709	non-native
Passiflora foetida L.	Australia	2017-08-07	Ryan Zonneveld and Christine Goosem				PA2	-10.8903	142.385	non-native
Passiflora foetida L.	Australia	2017-09-18	Bruce Webber & Paul Yeoh				PA20	-21.8039	114.108	non-native
Passiflora foetida L.	Australia	2017-09-19	Bruce Webber & Paul Yeoh				PA22	-22.0288	113.924	non-native
Passiflora foetida L.	Australia	2018-07-23	Gio Fichera and S. Raghu				PA228	-18.1028	138.481	non-native
Passiflora foetida L.	Australia	2017-10-30	Bruce Webber				PA24	-19.2681	146.816	non-native
Passiflora foetida L.	Australia	2018-07-24	Jon Schatz				PA244	-16.7583	136.98	non-native
Passiflora foetida L.	Australia	2017-09-08	Bruce Webber				PA25			non-native
Passiflora foetida L.	Australia	2018-07-25	Jon Schatz				PA275	-16.2886	133.388	non-native
Passiflora foetida L.	Australia	2017-09-07	Bruce Webber				PA28			non-native
Passiflora foetida L.	Australia	2017-09-13	Ryan Zonneveld and Christine Goosem				PA3	-16.7014	145.213	non-native
Passiflora foetida L.	Australia	2018-07-28	Jon Schatz				PA326	-12.659	131.319	non-native
Passiflora foetida L.	Australia	2017-09-07	Jon Schatz				PA33	-11.2116	130.403	non-native
Passiflora foetida L.	Australia	2018-06-10	A. White				PA342	-20.5873	139.577	non-native
Passiflora foetida L.	Australia	2017-09-07	Jon Schatz				PA38	-11.4364	130.538	non-native
Passiflora foetida L.	Australia	2017-10-04	Ryan Zonneveld and Christine Goosem				PA4	-13.6053	131.207	non-native
Passiflora foetida L.	Australia	2017-11-24	Jon Schatz				PA43	-12.6611	132.895	non-native
Passiflora foetida L.	Australia	2018-01-01	Gio Fichera and S. Raghu				PA60	-16.7863	145.674	non-native
Passiflora foetida L.	Australia	2018-01-01	Jon Schatz				PA63	-14.8142	132.932	non-native
Passiflora foetida L.	Australia	2018-01-01	Gio Fichera and S. Raghu				PA65	-12.6285	141.875	non-native
Passiflora foetida L.	Australia	2018-01-01	Gio Fichera and S. Raghu				PA69	-26.3829	153.098	non-native
Passiflora foetida L.	Australia	2018-01-01	Gio Fichera and S. Raghu				PA70	-26.3829	153.098	non-native
Passiflora foetida L.	Australia	2018-01-01	Garry Cook				PA74	-28.415	153.525	non-native
Passiflora foetida L.	Australia	2018-01-01	Garry Cook				PA75	-28.415	153.525	non-native
Passiflora foetida L.	Australia	2018-05-17	Chris Morris				PA82	-22.6344	118.116	non-native
Passiflora foetida L.	Australia	2018-05-29	Dan Wingett				PA83	-21.5758	117.057	non-native
Passiflora foetida L.	Australia	2018-05-29	Dan Wingett				PA85	-21.2144	117.05	non-native
Passiflora foetida L.	Australia	2017-10-23	Ryan Zonneveld and Christine Goosem				PA9	-16.0417	144.839	non-native
Passiflora foetida L.	Colombia		Mauricio Alberto Salazar Yepes, Juan Gonzalo Morales and Paola Betancur García				SV			native
Passiflora foetida L.	Ecuador	2009-02-15	Jørgensen, Peter Møller	2459	MOBOT	100169044	PH55	-3.33444	-79.4444	native
Passiflora foetida L.	Madagascar	2014-02-19	Martial	519	MOBOT	100701687	PH64	-14.1028	50.0519	non-native
Passiflora foetida L.	Nicaragua	2009-01-26	Stevens, Warren Douglas	28006	MOBOT	3590874	PH77	12.4911	-86.0681	native
Passiflora foetida var. acapulcensis Killip	Mexico	2002-10-13	MacDougal, John Mochrie	6183	MOBOT	1783038	PH105	19.38	-104.98	native
Passiflora foetida var. hispida (DC. ex Triana & Planch.) Killip ex Gleason	Caribbean	1990-04-29	Charlotte M. Taylor & P.J. Carstensen	9988	MOBOT	3861179	PH103	18.345	-65.6397	native
Passiflora foetida var. isthmia Killip	Panama	1981-09-17	Sandy Knapp	1227	MOBOT	3111567	PH104	8.66667	-79.75	native
Passiflora herbertiana Ker Gawl. subsp. herbertiana	Australia	2002-08-11	Copeland, L.M.	3401	CANB	CANB559550	PAH108	-29.3569	153.326	native
Passiflora herbertiana Ker Gawl. var. herbertiana	Australia	1993-06-15	Jones, D.L.	11577	CANB	CANB678512	PAH109	-20.9197	149.036	native
Passiflora incarnata L.	cultivated	2019-01-08	David Peaseley				PA430			non-native
Passiflora kuranda Krosnick & A.J.Ford	Australia	2004-10-15	Ford,A.	4474	QLD	AQ648067	PAH90	-16.9386	145.61	native
Passiflora kuranda Krosnick & A.J.Ford	Australia	2001-07-27	Miller,R.		QLD	AQ578813	PAH91	-16.1006	145.447	native
Passiflora ligularis Juss.	cultivated	2019-01-21	Greg Daley				PA432			non-native
Passiflora mollissima L.H. Bailey	cultivated		Tara Hopley				PA398			non-native
Passiflora quadrangularis Triana & Planch	cultivated	2019-01-21	Greg Daley				PA433			non-native
Passiflora suberosa L.	Australia	2013-03-27	Purdie, R.W.	8908	CANB	CANB864491	PAH111	-20.9244	149.036	non-native
Passiflora subpeltata Ortega	Australia	2000-10-05	Batianoff, G.N.	2010219	CANB	CANB550192	PAH113	-29.1567	151.407	non-native
Passiflora subpeltata Ortega	cultivated		Peter Bundock				PA532			non-native
Passiflora tarminiana Coppens & V.E.Barney	Australia	2009-03-08	Purdie, R.W.	7127	CANB	CANB782085	PAH116	-36.6972	149.974	non-native
Shouldn’t you add sensu lato after each P. foetida?
